# Supplementary material for: Molecular Evolution and Phylogenetic Analysis of Eight COL Superfamily Genes in Group I Related to Photoperiodic Regulation of Flowering Time in Wild and Domesticated Cotton (Gossypium) Species
Source: PLoS One. 2015 Feb 24;10(2):e0118669. doi: 10.1371/journal.pone.0118669 (PMC4339614; doi:10.1371/journal.pone.0118669)
Supplement: S1 Table — (XLS) [file pone.0118669.s001.xls]

## Sheet: Table S1
Table S1 Genome-wide COL family genes analysis in Gossypium
Gene	Group/subgroup	ID	length (bp)	Homologous genes in Arabidopsis	Homologous genes in rice	Chr.	Genomic position		Published GenBank
COL1	GroupⅠ	Gorai.008G059900.1|PACid:26817896	1125	AtCOL2	OSA	Chr08	9451544	9453154	/
COL2	GroupⅠ	Gorai.003G104600.1|PACid:26800629	1053	AtCOL2	OSA	Chr03	32248501	32249974	/
COL3	GroupⅠ	Gorai.010G245200.1|PACid:26756970	1017	AtCOL4	OSC	Chr10	61425882	61426975	JQ618334.1
COL4	GroupⅠ	Gorai.001G039500.1|PACid:26824250	999	AtCOL4	OSC	Chr01	3676945	3678034	/
COL5	GroupⅠ	Gorai.009G065600.1|PACid:26769729	1008	AtCOL4	OSC	Chr09	4657008	4658110	JQ618332.1
COL6	GroupⅠ	Gorai.004G030300.1|PACid:26773589	942	AtCOL5	OSE	Chr04	2397467	2398496	JQ618331.1
COL7	GroupⅠ	Gorai.004G102000.1|PACid:26777399	1107	AtCOL5	OSC	Chr04	18922166	18923368	/
COL8	GroupⅠ	Gorai.013G246000.1|PACid:26790496	891	AtCOL5	OSC	Chr13	56481521	56483087	/
COL9	GroupⅡ	Gorai.002G218400.1|PACid:26792166	1266	AtCOL16	OSL	Chr02	57033620	57034991	JQ618335.1
COL10	GroupⅡ	Gorai.004G113000.1|PACid:26772165	1257	AtCOL16	OSL	Chr04	25961567	25962982	/
COL11	GroupⅡ	Gorai.006G061600.1|PACid:26833863	1245	AtCOL16	OSL	Chr06	22449759	22451115	/
COL12	GroupⅢ	Gorai.001G190000.1|PACid:26819411	1227	AtCOL9	OSM	Chr01	31161632	31164391	/
COL13	GroupⅢ	Gorai.004G061000.1|PACid:26773893	1254	AtCOL9	OSM	Chr04	6016460	6019734	/
COL14	GroupⅢ	Gorai.007G164600.1|PACid:26778787	1266	AtCOL9	OSM	Chr07	14484909	14488452	/
COL15	GroupⅢ	Gorai.001G223800.1|PACid:26824813	1227	AtCOL9	OSM	Chr01	45685643	45688609	/
COL16	GroupⅢ	Gorai.001G099700.1|PACid:26823236	1200	AtCOL9	OSM	Chr01	11189671	11192035	/
COL17	GroupⅢ	Gorai.013G071300.1|PACid:26788327	1245	AtCOL12	OSN	Chr13	8325673	8328309	/
COL18	GroupⅢ	Gorai.005G209100.1|PACid:26803228	1266	AtCOL12	OSN	Chr05	58991202	58994204	/
COL19	GroupⅢ	Gorai.008G008400.1|PACid:26812843	1059	AtCOL13	OS07g47140.1	Chr08	1002319	1004142	/
COL20	GroupⅢ	Gorai.004G140600.1|PACid:26773513	1062	AtCOL13	OS07g47140.1	Chr04	39574379	39590453	/
COL21	GroupⅢ	Gorai.002G022300.1|PACid:26791645	1413	AtCOL14	OSO	Chr02	1556236	1558657	JQ618333.1
COL22	GroupⅢ	Gorai.005G195800.1|PACid:26804098	1335	AtCOL14	OSO	Chr05	56825410	56827289	/
COL23	GroupⅢ	Gorai.012G083100.1|PACid:26828557	1308	AtCOL14	OSO	Chr12	13849503	13851709	/
